# Supplementary material for: PROP1 triggers epithelial-mesenchymal transition-like process in pituitary stem cells
Source: eLife journal article supplement (doi:10.7554/elife.14470), 2016-06-28
Supplement: supp [file elife-14470-supp-v1.zip]

Archive with 7 entries (7 files):
- elife_poa_e14470_Figure_3_figure_supplement_1.pdf
- elife_poa_e14470_Figure_8_figure_supplement_1.pdf
- elife_poa_e14470_Supplementary_File_1.docx
- elife_poa_e14470_Figure_2_figure_supplement_1.pdf
- elife_poa_e14470_Figure_8_source_data_1.xlsx
- elife_poa_e14470_Figure_9_source_data_1.xlsx
- elife_poa_e14470_Figure_4_figure_supplement_1.pdf
