# Supplementary material for: PROP1 triggers epithelial-mesenchymal transition-like process in pituitary stem cells
Source: eLife journal article supplement (doi:10.7554/elife.14470), 2016-06-28
Supplement: supp [file elife-14470-supp-v1.zip › elife_poa_e14470_Figure_8_source_data_1.xlsx]

## Sheet: Sheet1
SYMBOL	ENTREZID	GENENAME	GHFT1 BirA 1	GHFT1 BirA 2	GHFT1 BirA 3	GHFT1 BirAProp1Tag 1	GHFT1 BirAProp1Tag 2	GHFT1 BirAProp1Tag 3
Gapdh	14433	glyceraldehyde-3-phosphate dehydrogenase	894.997	914.663	827.32	644.111	642.08	633.245
Prl	19109	prolactin	0.0794106	0.0400553	0	0	0	0
Gh	14599	growth hormone	0.0794106	0.0400553	0.112629	0.0599899	0.242523	0
Tshb	22094	thyroid stimulating hormone, beta subunit	0	0	0	0	0	0
Pou1f1	18736	POU domain, class 1, transcription factor 1	131.901	126.054	124.174	60.4098	62.1667	57.8583
Cga	12640	glycoprotein hormones, alpha subunit	0	0	0	0	0	0.0560642
