# Supplementary material for: PROP1 triggers epithelial-mesenchymal transition-like process in pituitary stem cells
Source: eLife journal article supplement (doi:10.7554/elife.14470), 2016-06-28
Supplement: supp [file elife-14470-supp-v1.zip › elife_poa_e14470_Figure_9_source_data_1.xlsx]

## Sheet: Sheet1
Regulation of the Epithelial-Mesenchymal Transition Pathway			Cell Cell Junction			Axonal Guidance
Gene	Gene description		Gene	Gene description		Gene	Gene description
BRAF	B-Raf proto-oncogene, serine/threonine kinase		ACTA2	actin, alpha 2, smooth muscle, aorta		ABL1	ABL proto-oncogene 1, non-receptor tyrosine kinase
CDH2	cadherin 2, type 1, N-cadherin (neuronal)		ACTN1 & 4	actinin, alpha		ACTR2 & 3	ARP2 actin-related protein 2 and 3 homolog (yeast)
CDH12	cadherin 12, type 2 (N-cadherin 2)		AKT3	v-akt murine thymoma viral oncogene homolog 3		ADAM9, 10, 12, 19 & 23	ADAM metallopeptidase domain 9, 10, 12, 19 and 23
CTNNB1	catenin (cadherin-associated protein), beta 1, 88kDa		ATF2	activating transcription factor 2		ADAMTS1, 5, 6 & 9	ADAM metallopeptidase with thrombospondin type 1 motif, 1, 5, 6 and 9
EGFR	epidermal growth factor receptor		CLDN1, 4, 5,13, 16, 19, 20, 23 & 24	Claudins		AKT3	v-akt murine thymoma viral oncogene homolog 3
FGF5, 7, 9, 10, 12, 16 & 23	fibroblast growth factor		CLINT1	clathrin interactor 1		ARHGEF6	Rac/Cdc42 guanine nucleotide exchange factor (GEF) 6
FGFR1 & 2	fibroblast growth factor receptor		CTNNA1	catenin (cadherin-associated protein), alpha 1		ARHGEF12	Rho guanine nucleotide exchange factor (GEF) 12
FZD1, 2, 4, 5, 7 & 8	frizzled class receptor		CTNNB1	catenin (cadherin-associated protein), beta 1		BDNF	brain-derived neurotrophic factor
GAB1	GRB2-associated binding protein 1		DLG1	discs, large homolog 1 (Drosophila)		BMP2, 3 & 5	bone morphogenetic protein 2, 3 & 5
GRB2	growth factor receptor-bound protein 2		ELK1	ELK1, member of ETS oncogene family		C9orf3	chromosome 9 open reading frame 3
GSC	goosecoid homeobox		F11R	F11 receptor		CFL2	Cofilin 2 (muscle)
GSK3B	glycogen synthase kinase 3 beta		GSK3B	glycogen synthase kinase 3 beta		CHP1	calcineurin-like EF-hand protein 1
HGF	hepatocyte growth factor		GUCY1A3 & B3	guanylate cyclase 1, soluble		CXCL12	chemokine (C-X-C motif) ligand 12
HIF1A	hypoxia inducible factor 1, alpha subunit		ITGA4 & A5	Integrin, alpha 4 & 5		DCC	DCC netrin 1 receptor
JAG1	Jagged 1		ITGB1	Integrin, beta 1		EFNA5 & B2	ephrin-A5 and B2
JAK1 & 2	Janus kinase		JAM3	junctional adhesion molecule 3		EPHA3, 6 & 7	EPH receptor A3, A6 and A7
LEF1	lymphoid enhancer-binding factor 1		JUN	jun proto-oncogene		FIGF	c-fos induced growth factor
LOX	lysyl oxidase		JUP	junction plakoglobin		FYN	FYN proto-oncogene, Src family tyrosine kinase
MAP2K1, 5 & 6	mitogen-activated protein kinase kinase		MAP2K1, MAP3K1, MAP3K3, MAP3K4, MAP3K5, MAP3K7, MAP3K13, MAP3K14, MAP3K15	mitogen-activated protein kinase kinase		FZD1, 2, 4, 5, 7 & 8	Frizzled class receptor 1, 2, 4, 5, 7 and 8
MAPK1	mitogen-activated protein kinase 1		MAPK1, MAPK14	mitogen-activated protein kinase		GLI2	GLI family zinc finger 2
MET	MET proto-oncogene, receptor tyrosine kinase		MPP6	membrane protein, palmitoylated 6		GLI3	GLI family zinc finger 3
MMP2	matrix metallopeptidase 2		MRAS	muscle RAS oncogene homolog		GNA12 & AI3	guanine nucleotide binding protein (G protein) alpha 12 and alpha inhibiting 3
MRAS	muscle RAS oncogene homolog		MYO7A	myosin VIIA		GNB1 & B2L1	guanine nucleotide binding protein (G protein) beta polypeptide 1 and 2like 1
NFKB1	nuclear factor of kappa light polypeptide enhancer in Bcells		NOS3	nitric oxide synthase 3 (endothelial cell)		GNG10, 11 & 12	guanine nucleotide binding protein (G protein), gamma 10, 11 and 12
NOTCH2	notch 2		NRAS	neuroblastoma RAS viral (v-ras) oncogene homolog		GRB2	growth factor receptor-bound protein 2
NRAS	neuroblastoma RAS viral (v-ras) oncogene homolog		OCLN	occluding		GSK3B	glycogen synthase kinase 3 beta
PARD6B	par-6 family cell polarity regulator beta		PRKAR2A	protein kinase, cAMP-dependent, regulatory, type II, alpha		HERC2	HECT and RLD domain containing E3 ubiquitin protein ligase 2
PARD6G	par-6 family cell polarity regulator gamma		PRKAR2B	protein kinase, cAMP-dependent, regulatory, type II, beta		IGF1	insulin-like growth factor 1 (somatomedin C)
PDGFD	platelet derived growth factor D		PRKG2	protein kinase, cGMP-dependent, type II		ITSN1	intersectin 1 (SH3 domain protein)
RAF1	Raf-1 proto-oncogene, serine/threonine kinase		PTEN	phosphatase and tensin homolog		LIMK2	LIM domain kinase 2
RBPJ	Recombination signal binding protein for igb kappa J region		PVRL1	poliovirus receptor-related 1 (herpesvirus entry mediator C)		MAP2K1	mitogen-activated protein kinase kinase 1
RRAS2	related RAS viral (r-ras) oncogene homolog 2		RAF1	Raf-1 proto-oncogene, serine/threonine kinase		MAPK1	mitogen-activated protein kinase 1
SMURF1	SMAD specific E3 ubiquitin protein ligase 1		RRAS2	Related RAS viral (r-ras) oncogene homolog 2		MET	MET proto-oncogene, receptor tyrosine kinase
SOS1	son of sevenless homolog 1 (Drosophila)		SORBS1	sorbin and SH3 domain containing 1		MKNK1	MAP kinase interacting serine/threonine kinase 1
STAT3	signal transducer and activator of transcription 3		SPTAN1	spectrin, alpha, non-erythrocytic 1		MMP2	matrix metallopeptidase 2
TCF4	transcription factor 4		SPTBN1	spectrin, beta, non-erythrocytic 1		MRAS	muscle RAS oncogene homolog
TCF7L2	transcription factor 7-like 2 (T-cell specific, HMG-box)		SRC	SRC proto-oncogene, non-receptor tyrosine kinase		MYL1	myosin, light chain 1, 12A and 12B
TGFB2 &3	transforming growth factor		TGFB3	transforming growth factor, beta 3		MYSM1	Myb-like, SWIRM and MPN domains 1
TGFBR1 & 2	transforming growth factor, beta receptor		TJAP1	tight junction associated protein 1 (peripheral)		NCK2	NCK adaptor protein 2
TWIST2	twist family bHLH transcription factor 2		TJP1	tight junction protein 1		NFAT5	nuclear factor of activated T-cells 5, tonicity-responsive
TYK2	tyrosine kinase 2		TJP2	tight junction protein 2		NFATC2 & 3	nuclear factor of activated T-cells, cytoplasmic, calcineurin-dependent 2 and 3
WNT2, 11 & 16	wingless-type MMTV integration site family member		TUBA1B & 1C	tubulin, alpha		NGF	nerve growth factor (beta polypeptide)
ZEB2	zinc finger E-box binding homeobox 2		TUBB6	tubulin, beta 6 class V		NRAS	neuroblastoma RAS viral (v-ras) oncogene homolog
			TUBB2B	tubulin, beta 2B class Iib		NRP1 & 2	neuropilin 1 and 2
			ZAK	sterile alpha motif and leucine zipper containing kinase AZK		NTNG1	netrin G1
						NTRK3	neurotrophic tyrosine kinase, receptor, type 3
						PAK2 & 3	p21 protein (Cdc42/Rac)-activated kinase 2 and 3
						PAPPA	pregnancy-associated plasma protein A, pappalysin 1
						PDGFC & D	platelet derived growth factor C and D
						PFN2	profilin 2
						PIK3CB & G	phosphatidylinositol-4,5-bisphosphate3-kinase catalytic subunit beta, gamma
						PIK3R1 & 5	phosphoinositide-3-kinase, regulatory subunit 1 and 5
						PLCB4, D4 & E1	phospholipase C, beta 4, delta 4 and epsilon 1
						PLXNA2 & C1	plexin A2 and C1
						PPP3CA & B	protein phosphatase 3, catalytic subunit, alpha and beta isozymes
						PPP3R1	protein phosphatase 3, regulatory subunit B, alpha
						PRKAR2A & B	protein kinase, cAMP-dependent, regulatory, type II, alpha and beta
						PRKCH	protein kinase C
						PRKD1 & D3	protein kinase D1 and D3
						PTCH1 & 2	patched 1 and 2
						PTK2	protein tyrosine kinase 2
						PXN	paxillin
						RAF1	Raf-1 proto-oncogene, serine/threonine kinase
						RASA1	RAS p21 protein activator (GTPase activating protein) 1
						RGS3	Regulator of G-protein signaling 3
						ROBO1 & 2	roundabout, axon guidance receptor, homolog 1 (Drosophila)
						ROCK2	Rho-associated, coiled-coil containing protein kinase 2
						RRAS2	related RAS viral (r-ras) oncogene homolog 2
						SEMA3A, 3C, 3D & 3E	sema domain, Ig domain, short basic domain, secreted, 3A, 3C, 3D and 3E
						SEMA4B	sema domain, Ig domain, transmembrane domain, 4B and 4D
						SEMA5A	sema domain, seven thrombospondin repeats, transmembrane, 5A and 6A
						SLIT3	slit homolog 3 (Drosophila)
						SOS1	son of sevenless homolog 1 (Drosophila)
						SRGAP1, 2 & 3	SLIT-ROBO Rho GTPase activating protein 1, 2 and 3
						UNC5C	unc-5 homolog C (C. elegans)
						WNT2, 11 & 16	wingless-type MMTV integration site family member 2, 11 and 16
