# Supplementary figures and images for: PROP1 triggers epithelial-mesenchymal transition-like process in pituitary stem cells
Source: eLife journal article supplement (doi:10.7554/elife.14470), 2016-06-28

# Figure 3-Figure S1

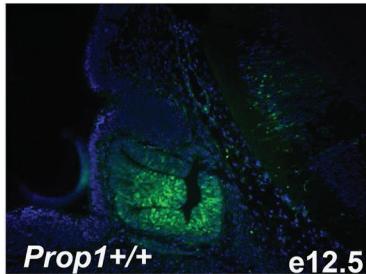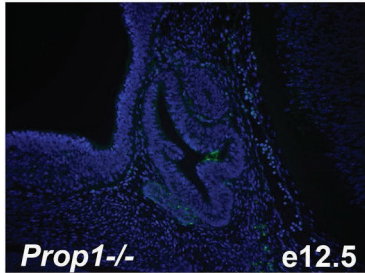

Supplement: supp [file elife-14470-supp-v1.zip › elife_poa_e14470_Figure_3_figure_supplement_1.pdf]

A

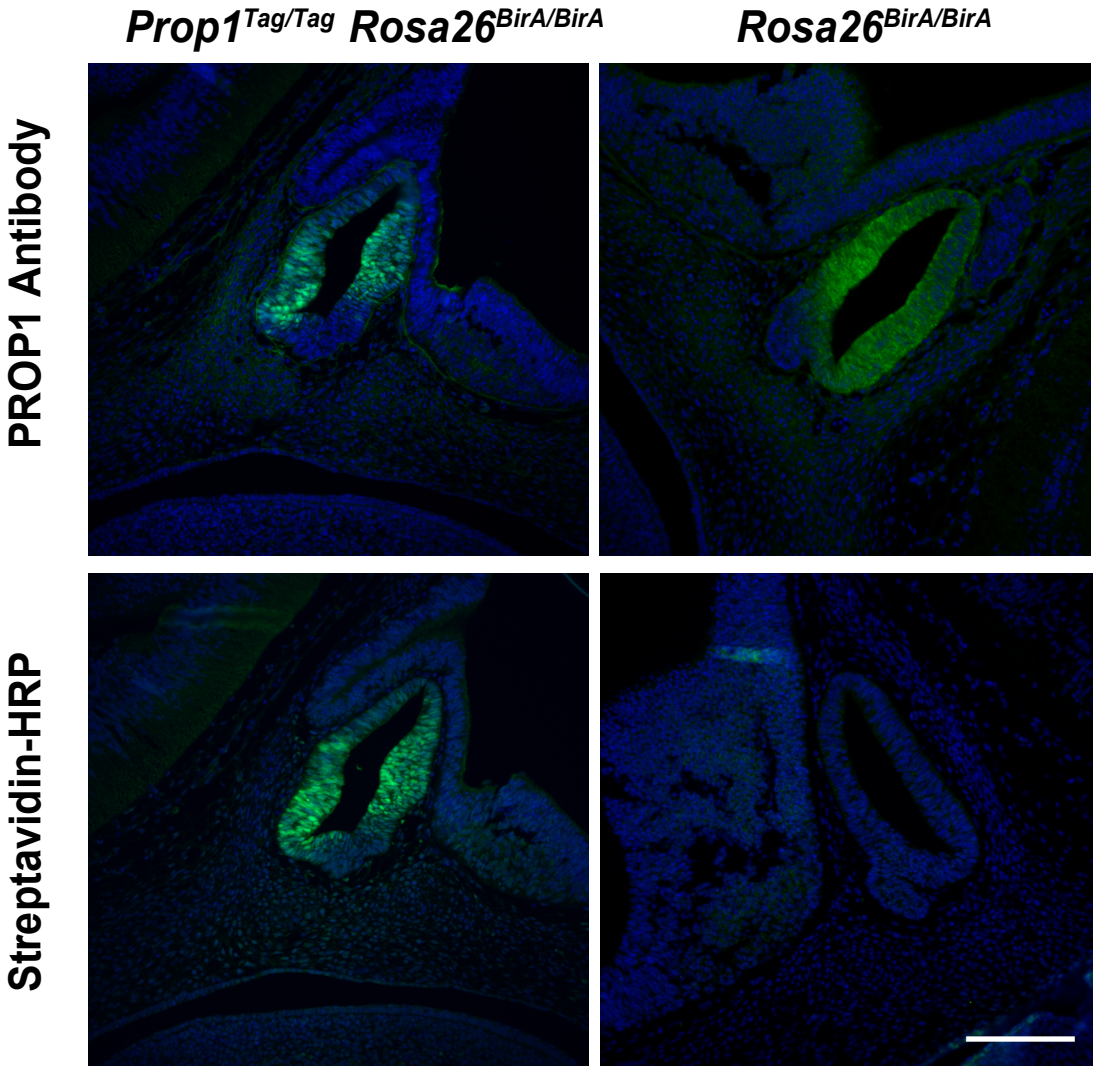

B

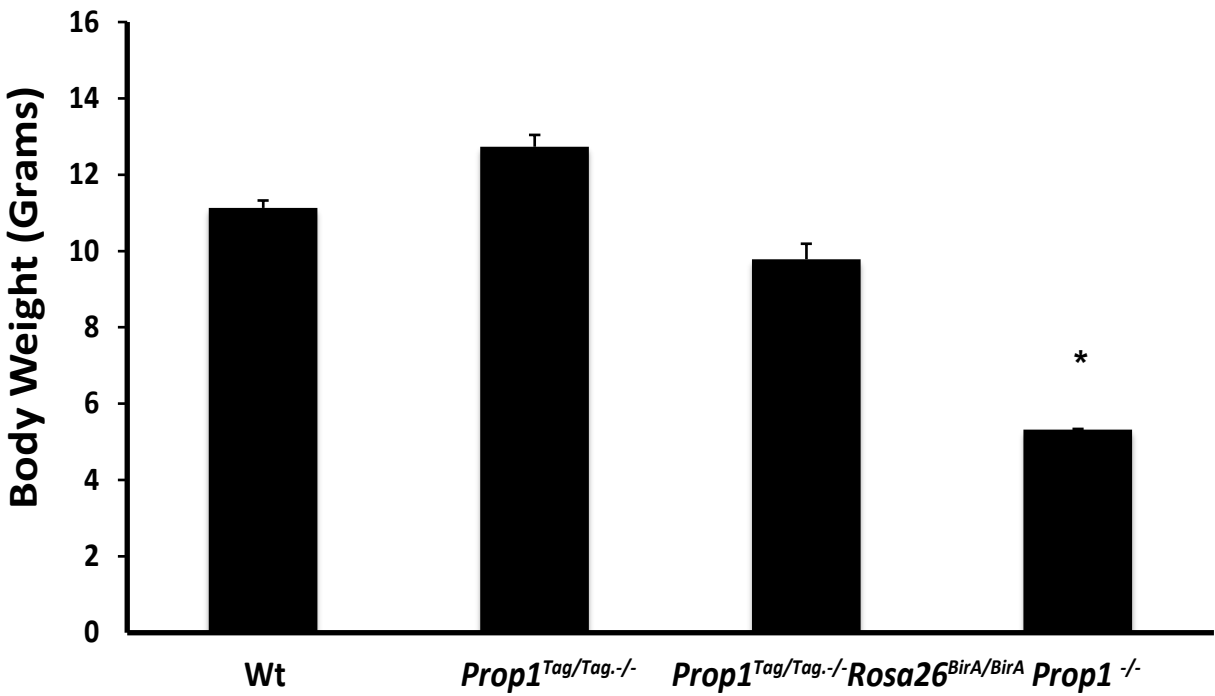

C

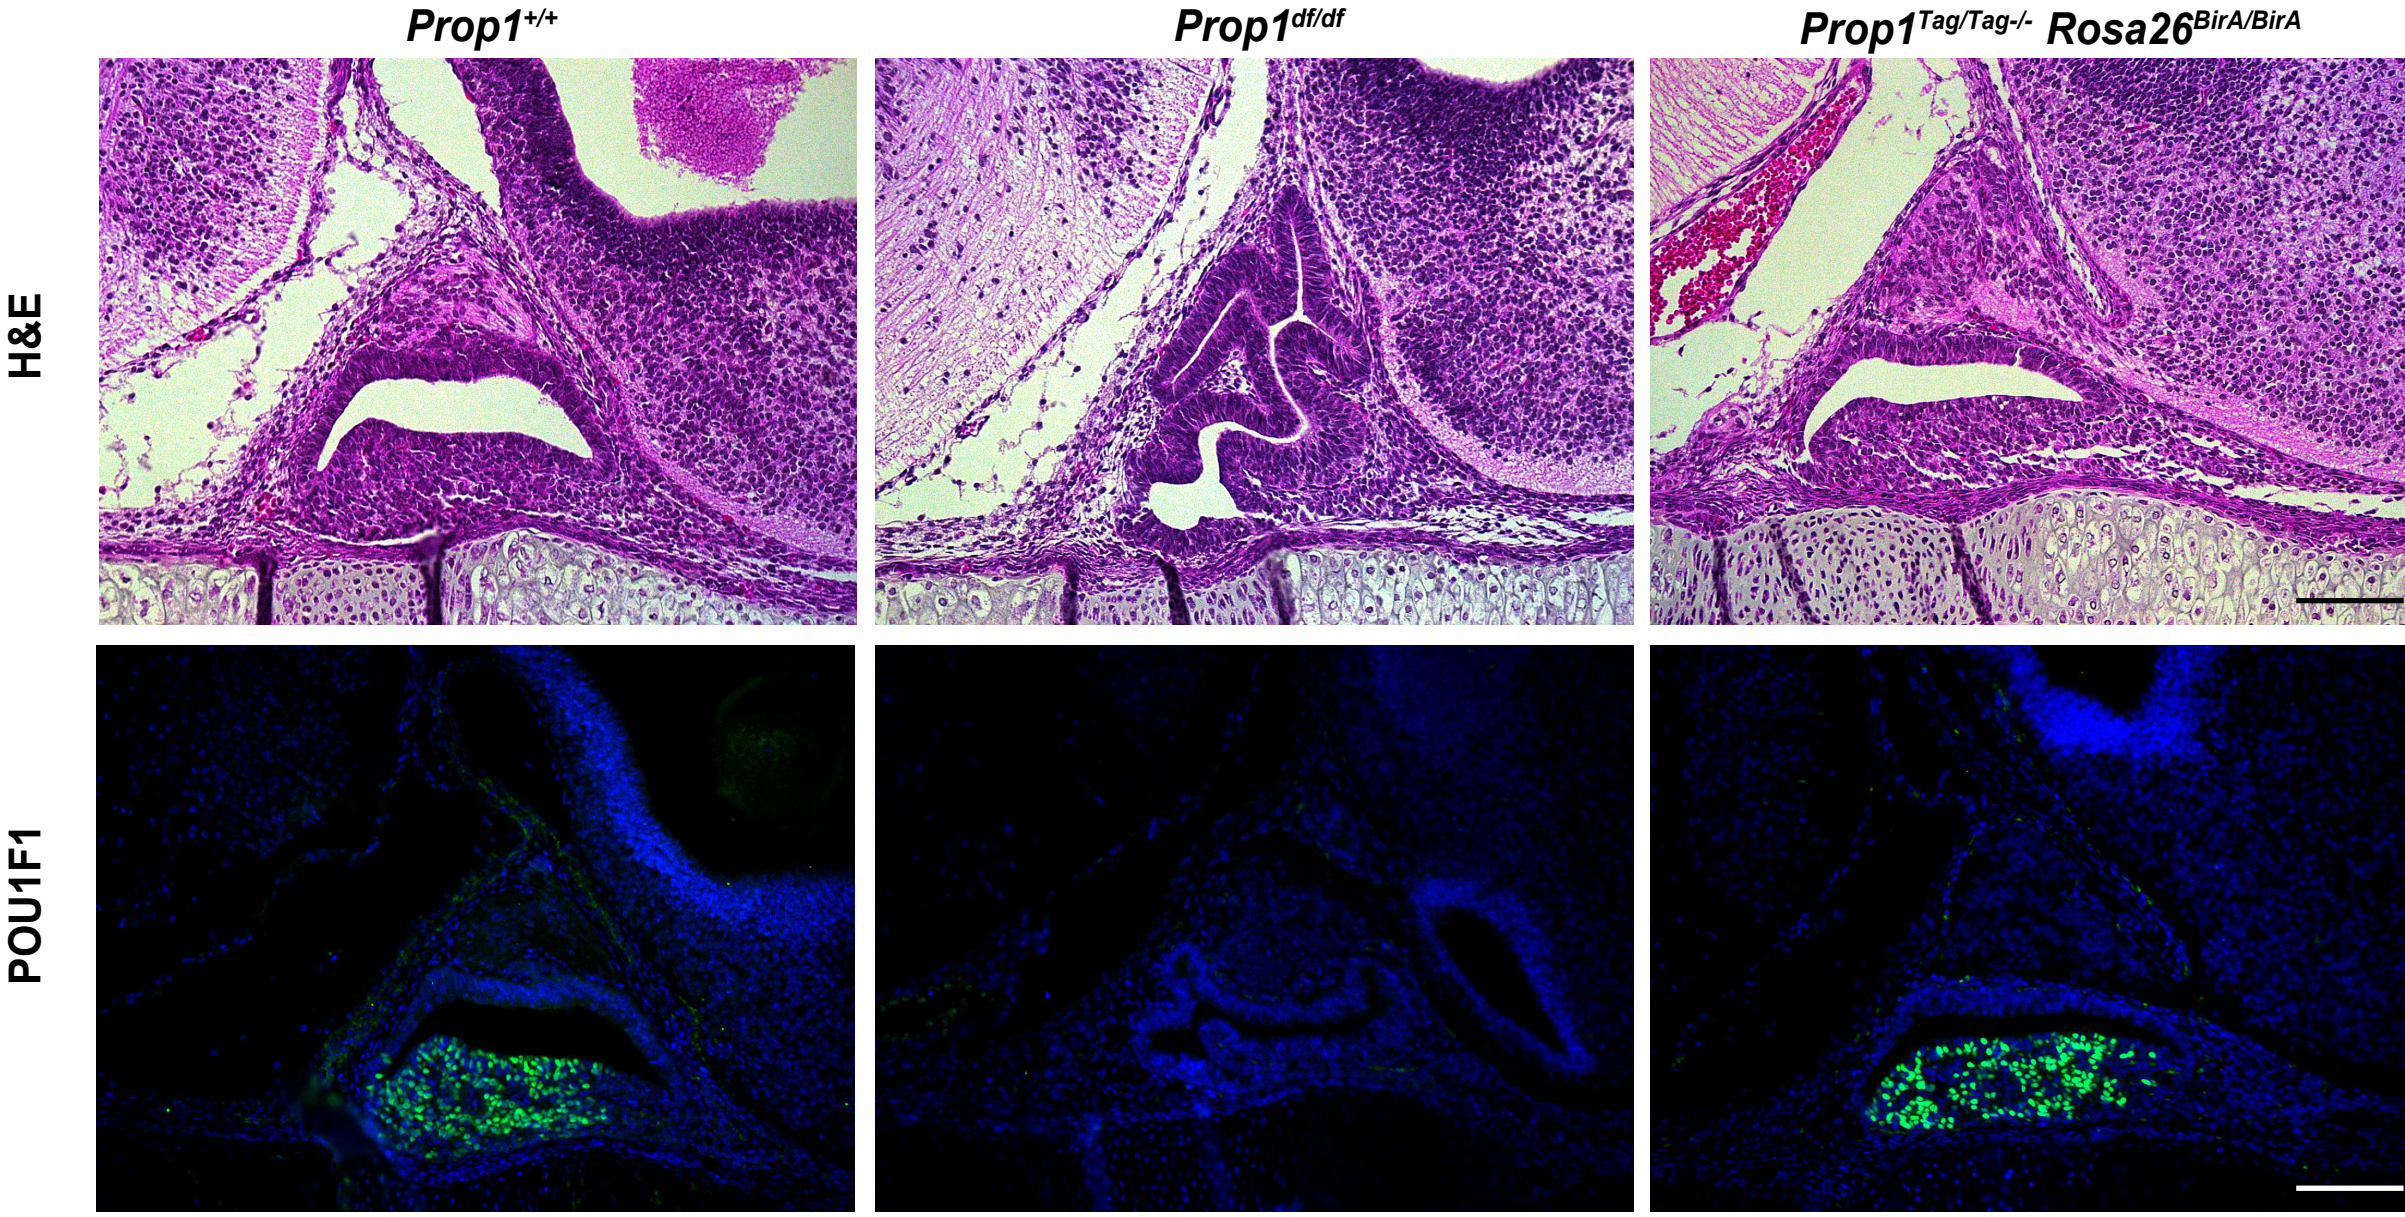

Supplement: supp [file elife-14470-supp-v1.zip › elife_poa_e14470_Figure_8_figure_supplement_1.pdf]

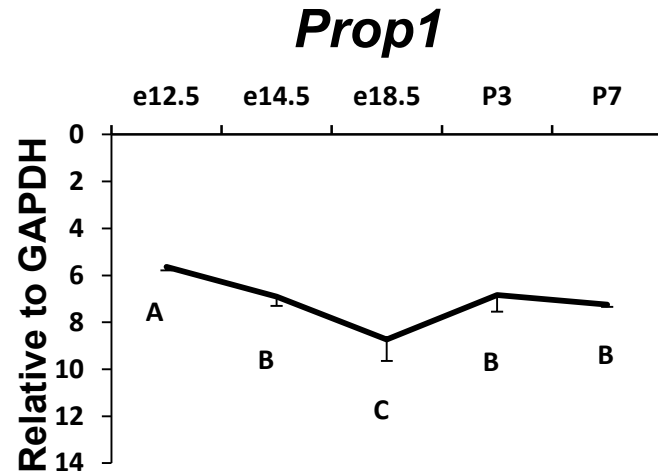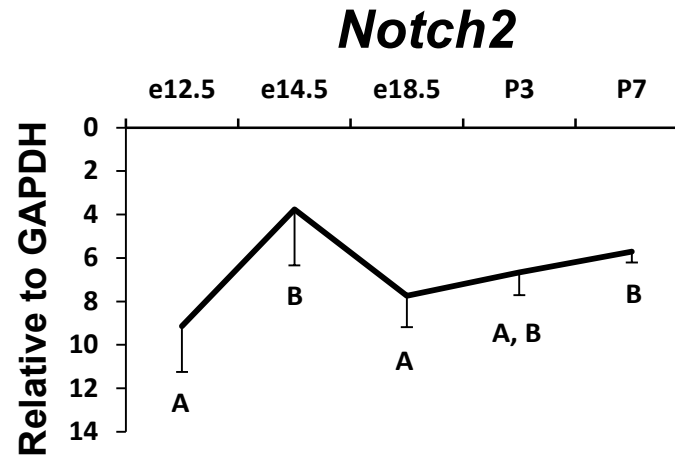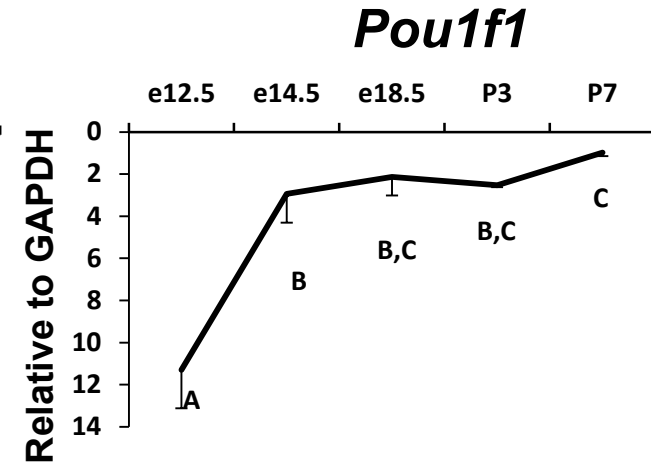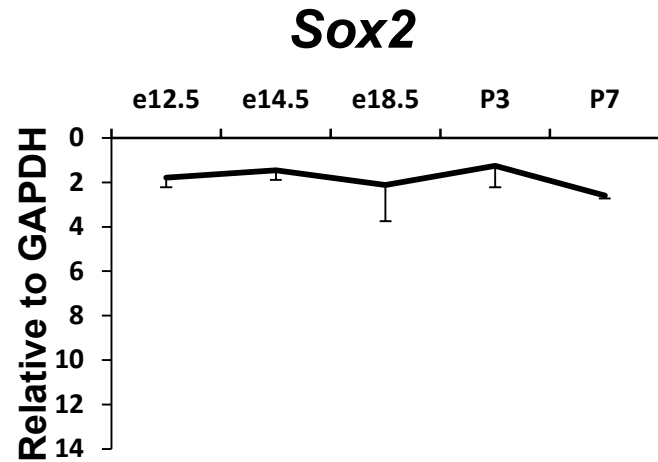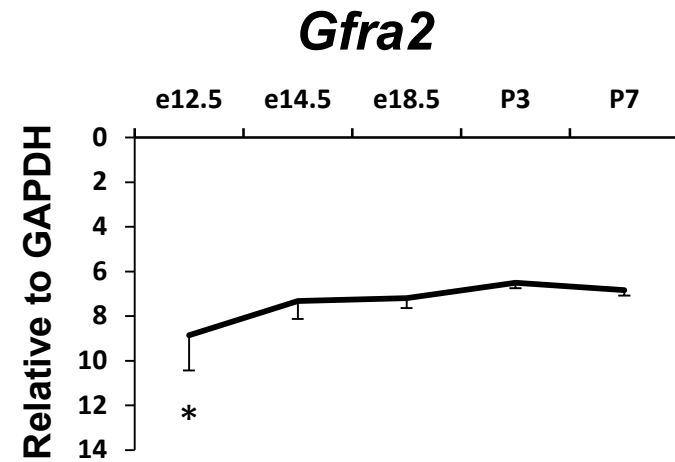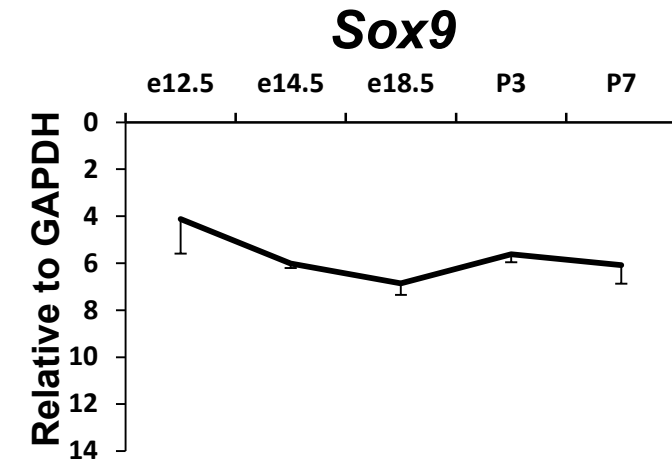

Supplement: supp [file elife-14470-supp-v1.zip › elife_poa_e14470_Figure_2_figure_supplement_1.pdf]

Figure 4-Figure S1

**Wt**

***Prop1*<sup>df/df</sup>**

***Pou1f1*<sup>dw/dw</sup>**

**SOX2**

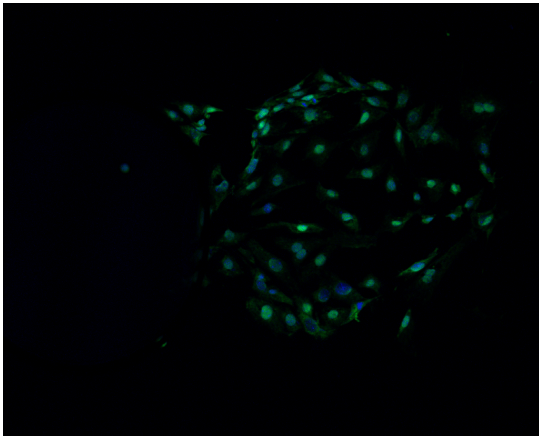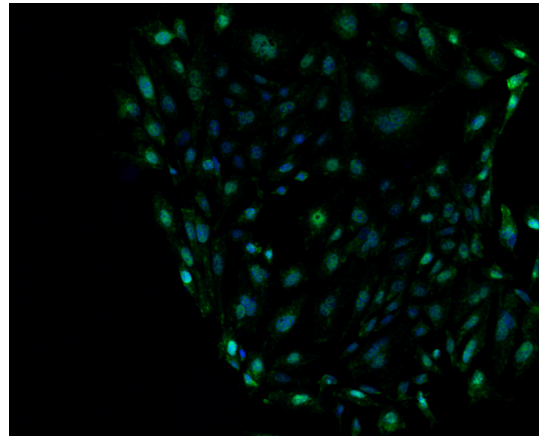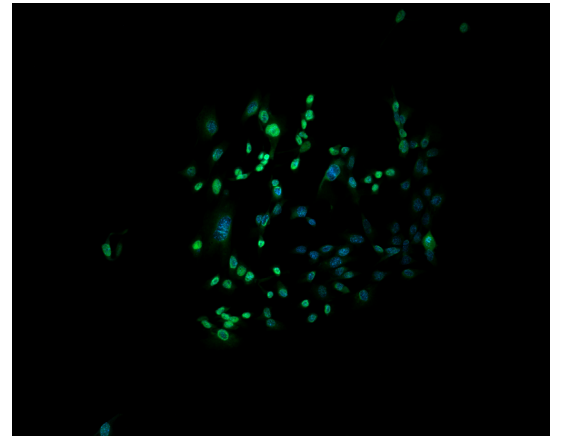

**SOX9**

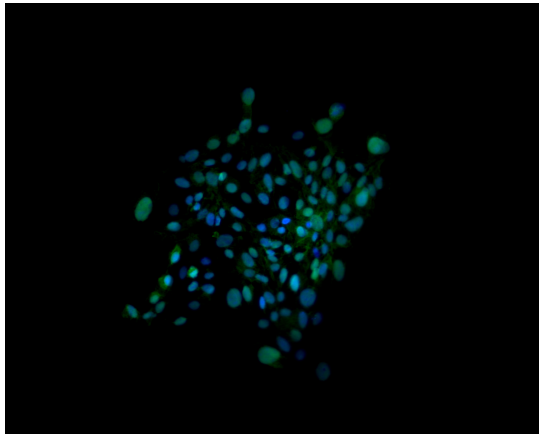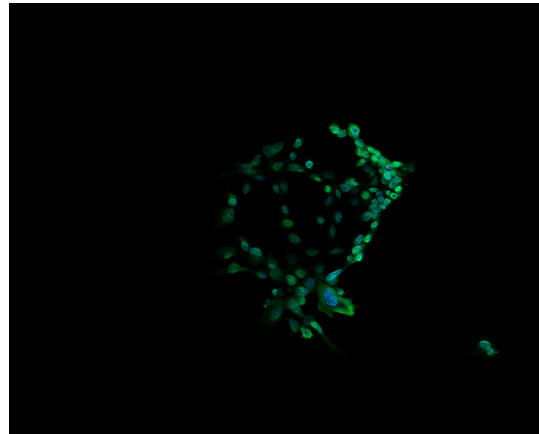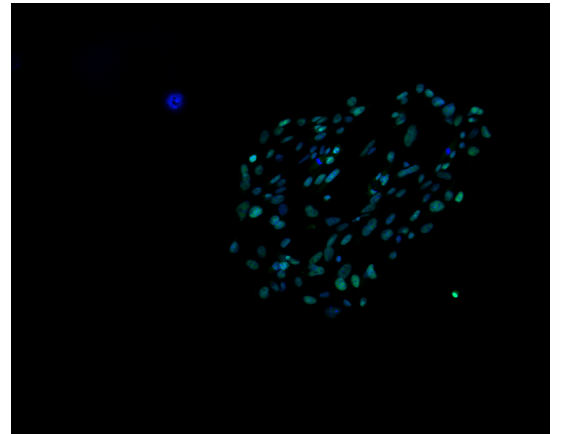

**GFRa2**

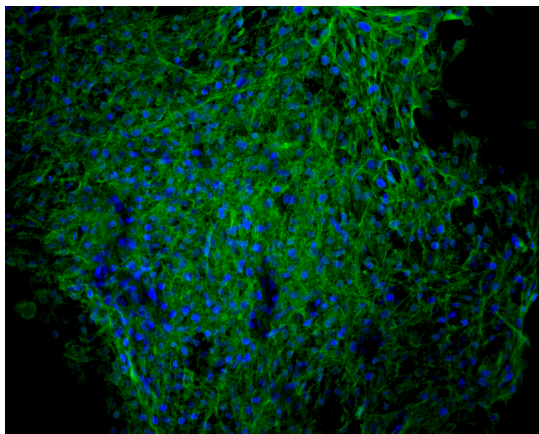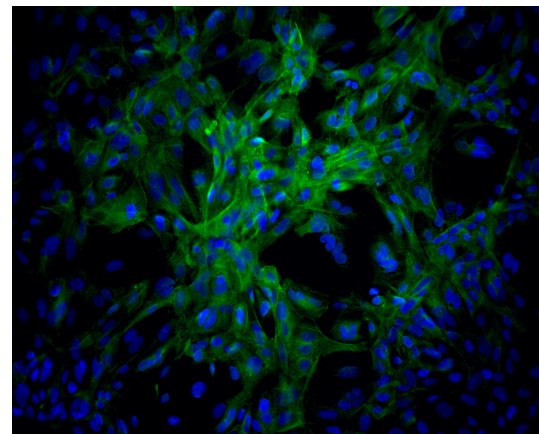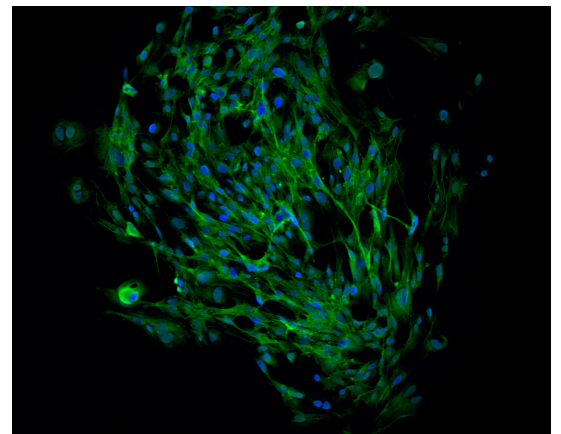

**CyclinD2**

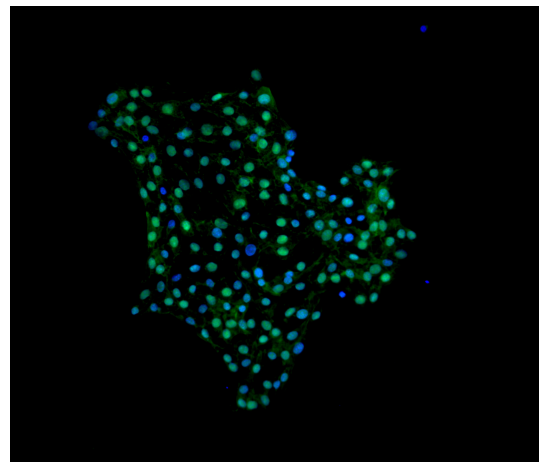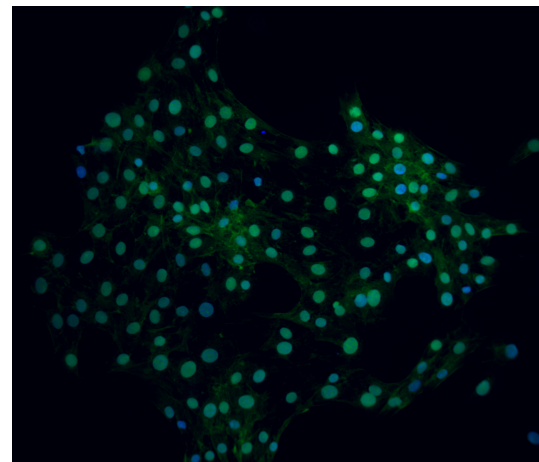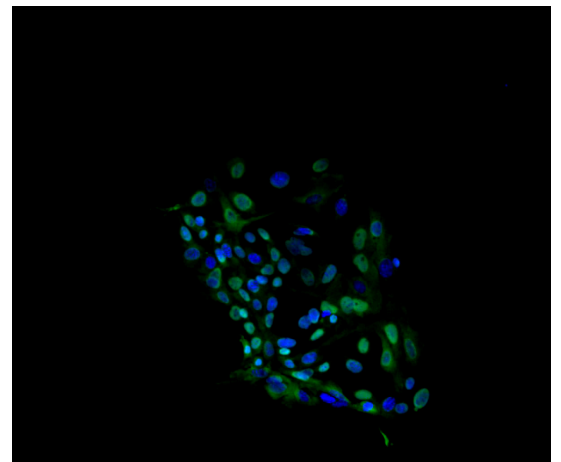

Supplement: supp [file elife-14470-supp-v1.zip › elife_poa_e14470_Figure_4_figure_supplement_1.pdf]
